1 **Bioluminescent *Mycobacterium ulcerans*, a tool to study host-pathogen interactions in**  
2 **a murine tail model of Buruli ulcer**

3

4 Till F. Omansen<sup>1,2</sup>, Renee A. Marcsisin<sup>1</sup>, Brendon Y. Chua<sup>1</sup>, Weiguang Zeng<sup>1</sup>, David C.  
5 Jackson<sup>1</sup>, Jessica L. Porter<sup>1</sup>, Ymkje Stienstra<sup>2</sup>, Tjip S. van der Werf<sup>2,3</sup>, Timothy P. Stinear<sup>1\*</sup>

6

7 Affiliations:

8 <sup>1</sup> Department of Microbiology and Immunology, The Peter Doherty Institute for Infection  
9 and Immunity, University of Melbourne, Parkville, VIC 3010, Australia.

10 <sup>2</sup> University of Groningen, Department of Internal Medicine/Infectious diseases,  
11 University Medical Center Groningen, 9700 RB Groningen, The Netherlands.

12 <sup>3</sup> University of Groningen, Department of Pulmonary Diseases & Tuberculosis, University  
13 Medical Center Groningen, 9700 RB Groningen, The Netherlands.

14

15 \* Corresponding author: Prof. Timothy P. Stinear, Department of Microbiology and  
16 Immunology, The Peter Doherty Institute for Infection and Immunity, University of  
17 Melbourne, Parkville, VIC 3010, Australia, [tstinear@unimelb.edu.au](mailto:tstinear@unimelb.edu.au)

18

19 Running title: “Bioluminescent *M. ulcerans* mouse-tail model”

20

21 Key words: Buruli ulcer, *Mycobacterium ulcerans*, Bioluminescence, mouse-model,  
22 immune response

24 **Abstract**

25 Buruli ulcer is a neglected tropical disease caused by infection with *Mycobacterium*  
26 *ulcerans*. In this study we used a previously reported strain of *M. ulcerans*, genetically  
27 engineered to constitutively produce bioluminescence, to follow the progression of Buruli  
28 ulcer in mice using an in-vivo imaging (IVIS®) system. We aimed to characterize a mouse  
29 tail infection model for pathogenesis, as well as for pre-clinical vaccine and drug  
30 development research for Buruli ulcer. Immune parameters, such as antibody titers and  
31 cytokine levels, were determined throughout the course of the infection and histology  
32 specimens were examined for comparison with human pathology. Nine out of ten (90%)  
33 BALB/c mice infected subcutaneously with  $10^5$  *M. ulcerans* JKD8049 (containing  
34 pMV306 hsp16+luxG13) exhibited light emission from the site of infection over the course  
35 of the experiment indicating *M. ulcerans* growth *in-vivo*. Five out of ten (50%) animals  
36 developed clinical signs of disease. Antibody titers were overall low and their onset was  
37 late, as measured by responses to both heterogenous (bacterial whole cell lysate) and single  
38 antigen (Hsp18) targets. IFN- $\gamma$ , and IL-10 are reported to play a vital role in host control  
39 of Buruli ulcer and these cytokines were elevated in animals with pathology. For mice with  
40 advanced pathology, histology revealed clusters of acid-fast bacilli within subcutaneous  
41 tissue 300-400  $\mu$ m beneath the epidermis of the tail, with macrophage infiltration and  
42 granuloma-formation resembling human Buruli ulcer. This study has shown the utility of  
43 using bioluminescent *M. ulcerans* and IVIS® in a mouse tail infection model to study  
44 Buruli ulcer infection.

45

46 **Author summary**

47 Buruli ulcer is one of the so called neglected tropical diseases. It is an infectious disease,  
48 mainly occurring in West Africa but also in Australia. It manifests as skin lesion and ulcer.  
49 Up to date, the way of transmission is inadequately understood. Also, there is no vaccine  
50 to protect against the disease. Buruli ulcer is treatable with a course of antibiotics that need  
51 to be given for the duration of two months. More laboratory research is needed to elucidate  
52 the mechanism of transmission, develop a vaccine and improve and shorten antibiotic  
53 therapy. For this, animal (mouse) models of disease are used. The aim of this study was to  
54 refine and improve the mouse tail infection model of Buruli ulcer. For this, we used a  
55 genetically modified *Mycobacterium ulcerans* strain that emits light. After infection of  
56 animals, light emitted from the bacteria was read out with an in-vivo imaging (IVIS)  
57 camera. This allowed us to monitor the location of bacteria in the living animal over time  
58 without the need to kill the animal. We also measured parameters of the immune system  
59 such as antibodies and cytokines as a baseline for future studies into immunology, vaccine  
60 development and pathology of Buruli ulcer. We successfully improved and characterized  
61 the mouse tail infection model in Buruli ulcer with the use of modern technology using  
62 light emitting bacteria and the IVIS camera.

63

64

## 65 **Introduction**

66 *Mycobacterium ulcerans* causes the neglected tropical disease (NTD) Buruli ulcer (BU)  
67 that can manifest as a skin nodule, plaque, edematous lesion or open skin ulcer  
68 characterized by yellowish-white necrosis and undermined edges [1]. The disease generally  
69 occurs in clustered foci in rural Central and Western Africa but has also gained prominence  
70 in specific regions of south east Australia. Currently, 12 countries actively report Buruli  
71 ulcer cases and 33 have ever reported cases [2]. Patients with Buruli ulcer suffer from  
72 stigmatization, social participation restrictions and physical disability long after even  
73 treatment is complete [3]. The main pathogenic factor in BU is a diffusible cytotoxin called  
74 mycolactone. Mycolactone is a polyketide-derived macrolide that is responsible for the  
75 pathological triad of necrosis, suppressed local inflammatory response and hypoalgesia of  
76 the lesion [4,5]. By means of preventing protein translocation into the endoplasmic  
77 reticulum, mycolactone suppresses an efficient host innate and adaptive immune response  
78 [6,7]. The 174kb large plasmid pMUM001 is responsible for ML production by *M.*  
79 *ulcerans* [8].

80

81 There are several major challenges to control Buruli ulcer. The mode of transmission is not  
82 yet completely understood and seems to vary by geographic location, although puncturing  
83 injuries after contamination from an environmental source seem to be a major cause and in  
84 south east Australia at least, mosquitoes have been linked to transmission [9]. Buruli ulcer  
85 is currently treated with an eight-week regimen of rifampin and streptomycin or a regimen  
86 where the injectable streptomycin is replaced with clarithromycin after four weeks; a fully  
87 oral, eight-week rifampin and clarithromycin regimen has been trialled in humans and

88 current trial analysis is ongoing (ClinicalTrials.gov Identifier: NCT01659437) [10,11].  
89 Progressed, larger lesions are often managed with surgical excision of the infected tissue  
90 followed by functional repair and skin grafting [12]; a recent study showed that the time-  
91 point for decision making on whether to intervene surgically or not does not matter for  
92 overall healing outcomes [13]. No vaccine is available despite several efforts to employ  
93 the BCG-vaccine or to develop novel vaccines [14-23].

94

95 More preclinical research in *M. ulcerans* transmission, chemotherapy and vaccination as  
96 well as pathogenesis, is necessary to solve the biomedical challenges complicating Buruli  
97 ulcer infection control in the field. In this respect, *M. ulcerans* mouse-infection models  
98 have been pivotal in guiding research and clinical studies regarding these questions in the  
99 past [24-26]. Murine footpad and tail infection are established methods to study *M.*  
100 *ulcerans* [24,27]. The footpad-model has been derived from experience with experimental  
101 infection of *M. leprae* in mice [24,28]. It has been used in numerous pre-clinical studies,  
102 to mainly evaluate drug efficacy, but also vaccines for *M. ulcerans* [25,26,29-41]. Tail  
103 infection has been used to study pathology and vector research [27] and vaccinology [14].  
104 Given that Buruli ulcer in humans is a subcutaneous infection mostly occurring on the  
105 lower and upper limbs [1,42], the mouse foot and tail are obvious sites to model the disease  
106 and the absence of fur in mice allows for easy clinical observation at these sites. Tail  
107 infection offers a cutaneous infection site that is not in contact with the environment as  
108 much as the footpad so that contamination, re-distribution or loss of inoculum and animal  
109 impairment in more advanced stages of the disease are less likely to occur. Also, it is a  
110 more practical region for imaging than the footpad. Bioluminescent strains of *M. ulcerans*

111 have successfully been employed to evaluate drug efficacy in *in-vitro* and *in-vivo* drug  
112 efficacy studies [36,37,41,43] and in vector ecology studies of *M. ulcerans* [44]. Drug  
113 efficacy studies used a luminometer to assess light emission from infected mouse footpads  
114 [36,41,45].

115

116 In this study, we aimed to employ the use of a bioluminescent reporter strain of *M.*  
117 *ulcerans* to infect BALB/c mice and read out light emission using an *in-vivo* imaging  
118 system (IVIS®) that is both very sensitive at detecting light and enables us to visualize  
119 signals from the entire mouse body and thus localize the bacteria. This allows to confirm  
120 the site of infection and study possible spread of bacteria. We also characterized the  
121 immune-responses to this *M. ulcerans* strain in infected BALB/c mice over a long-term  
122 infection period of 17 weeks to establish a baseline for future transmission, vaccine and  
123 chemotherapy studies.

124

125 The bioluminescent *M. ulcerans* strain used in this study has been previously described and  
126 contains the pMV306 hsp16+luxG13 reporter plasmid [43,46,47] that integrates into the  
127 mycobacterial chromosome and contains the lux operon (luxABCDE). Thus, it does not  
128 require the addition of an exogenous substrate to detect bioluminescence [46].  
129 Bioluminescent infection-models offer the possibility of *in vivo* imaging, with the  
130 luminescence read-out serving as proxy for bacterial burden. This approach greatly reduces  
131 mouse experiment sample sizes, preventing multiple animals to be killed for a common  
132 microbiological assessment such as counting bacterial colony-forming units (CFU) at

133 different time points. It also offers a way to visualize disease progression over time, as well  
134 as bacterial spread in the living host.

135

## 136 **Materials and Methods**

137

138 **Culture conditions:** *M. ulcerans* JKD8049 harbouring pMV306 hsp16+luxG13 was  
139 grown on Middlebrook 7H10 agar or in 7H9 broth containing 10% Oleic Albumin Dextrose  
140 Catalase Growth Supplement (Middlebrook, Becton Dickinson, Sparks, MD, USA), 0.5%  
141 glycerol and 25µg/ml kanamycin sulfate (Amresco, Solon, OH, USA). Plates and flasks  
142 were incubated for 8-10 weeks at 30°C, 5% CO<sub>2</sub>. LC-MS was used to confirm that  
143 bioluminescent bacteria were still producing mycolactones [48].

144

145 **Establishing a standard curve for bioluminescent *M. ulcerans* JKD8049.** Light  
146 emission in photos/sec was compared with colony-forming units (CFU) for *M. ulcerans*  
147 JKD8049 cultured in Middlebrook 7H9 medium for 4 weeks and then diluted in serial 10-  
148 fold steps in 96-well trays. Photon emissions were captured using a Lumina XRMS Series  
149 III In Vitro Imaging System (IVIS®) (Perkin Elmer, Waltham, MA, USA). Bacterial CFUs  
150 were confirmed by the spot plate method [9].

151

152 **Mouse-tail infections:** Animal experimentation adhered to the Australian National Health  
153 and Medical Research Council Code for the Care and Use of Animals for Scientific  
154 Purposes and was approved by and performed in accordance with the University of  
155 Melbourne animal ethics committee (Application: 1312756.1). The animals were

156 purchased from ARC (Canning Vale, Australia). Upon arrival, animals acclimatized for 5  
157 days. Food and water were given *ad libitum*. Ten six-week old, female BALB/c mice were  
158 inoculated with approximately  $10^5$  *M. ulcerans* CFU by subcutaneous (SC) injection into  
159 the dorsal aspect of the upper third of the tail. The concentration of the bacterial inocula  
160 was confirmed by spot plating. After 17 weeks post-inoculation or whenever the humane  
161 endpoint was reached, mice were humanely killed.

162

163 ***In-vivo imaging:*** Mice were imaged once a week during morning time using a Lumina  
164 XRMS Series III IVIS® as described above. During imaging, mice were anaesthetized with  
165 2.5% isoflurane gas (Ceva Animal Health, Glenorie, NSW, Australia) with the stage on  
166 which the mice were placed during imaging was warmed to 37°C. Photon emissions were  
167 acquired with the following settings: exposure time 5 minutes, emission filter: open,  
168 excitation filter: blocked, binning: medium, F/stop 1. These images were superposed onto  
169 conventional black/white photographs (exposure time: auto, binning: medium, F/stop: 16).  
170 Images from the ventral and dorsal aspect of the tail were taken. Images were analyzed  
171 using Living Image® software. Areas emitting light were defined as regions of interest  
172 (ROI). A copy of every ROI was placed next to those areas for background measurement.  
173 Photons per second from the ROIs were computed and values from control regions  
174 subtracted from the actual ROI. Results from ventral and dorsal images (Fig. 1B) were  
175 added and the cumulative luminescence of the two imaging angles reported.

176

177 **ELISA:** Blood samples were obtained by sub-mandibular puncture and, at experimental  
178 endpoint, by cardiac puncture. Serum was collected by centrifugation and stored at -20°C.



179 All incubation of ELISA-plates was done in a moisturized container at room temperature.  
180 Flat-bottom polyvinyl chloride microtiter-plates (Thermo Fischer, Milford, MA, USA)  
181 were coated with 5µg of the antigen overnight. Antigens used were the mycobacterial small  
182 heat-shock protein 18 (Hsp18) and *M. ulcerans* whole cell lysate (WCL). The antigen was  
183 discarded and plates blocked for 1h with PBS containing 10mg/ml bovine serum albumin  
184 (BSA). Plates were washed four times with PBS containing 0.05% Tween-20 (PBST). Sera  
185 were added in eight serial dilutions in PBS to the plate and incubated for 4 h. Plates were  
186 washed with PBST again and 50µl/well HRP-conjugated polyclonal rabbit anti-mouse Ig-  
187 antibody (Dako, Glostrup, Denmark) was added for 1h. Subsequently, ELISA substrate  
188 (0.2 mM 2,29-azino-bis 3-ethylbenzthiazoline-sulfonic acid in 50 mM citric acid  
189 containing 0.004% hydrogen peroxide) was added to detect bound antibodies. Absorbance  
190 was read in a plate reader at 405nm and 450nm and the average of the two wavelengths  
191 recorded.

192

193 **Intracellular cytokine staining and FACS:** Dissected spleens were homogenized with a  
194 mesh and ATC treated. Splenocytes ( $1 \times 10^6$ ) were re-stimulated with 2µg *M. ulcerans*  
195 JKD8049 whole cell lysate (WCL) in RPMI 1640 supplemented with 64mM L-glutamine,  
196 32 mM sodium pyruvate, 1.75mM 2-mercaptoethanol, 3165µg/ml penicillin (all Gibco®  
197 Life Technologies, NY, USA), 760 µg/ml gentamicin (G-Bioscience, St. Louis, MO, USA)  
198 and 10% heat-inactivated fetal calf serum (CSL, Parkville, Australia) for 72h at 37°C, 5%  
199 CO<sub>2</sub>. Plates were spun down, supernatant collected and stored at -20°C. Cytokines were  
200 stained using the bead-based Cytometric Bead Array (CBA) Mouse Th1/Th2/Th17  
201 Cytokine Kit (BD, North Ryde, NSW, Australia) according to the manufacturer's

202 instructions. Samples were run on a BD FACSCanto™ II Flow Cytometry System and data  
203 analyzed using FCAP Array™ Analysis Software version 3.0.

204

205 **Histology:** A section ranging approximately 5mm from the midline of the ulcer proximally  
206 was dissected and stored in 10% buffered formalin for histological assessment. Prepared  
207 paraffin blocks were surface-decalcified with 10% nitric acid for 5 minutes before cutting  
208 4µm sections. Hematoxylin and eosin (HE) and Ziehl-Neelsen (ZN) staining were used  
209 following standard protocols. The specimens were subjected for analysis by an independent  
210 pathologist. Presence of AFB, inflammatory cells (macrophages, plasma cells/lymphocytes,  
211 neutrophils and eosinophils) as well as the degree of inflammation (granulomas,  
212 panniculitis, calcification, vasculitis, neuritis) and the tissue damage (dermal and fat tissue  
213 necrosis, muscle layer involvement and bone change) and the vascular involvement were  
214 scored. Specimens from two non-infected, naïve mice were used as controls.

215

216 **Statistical analysis:** Statistical analysis was performed using GraphPad Prism version 7.0a  
217 (GraphPad Software, Inc., San Diego, CA). RLU data were graphed as mean of the ventral  
218 and dorsal reading, as described above. Time to bioluminescence is displayed as survival  
219 curve. Antibody titers are represented as the reciprocal of the highest dilutions of serum  
220 needed to measure an absorbance value of 0.2. This was achieved by transformation of the  
221 data by plotting absorbance values vs log<sub>0.5</sub>—fold dilutions data of each group and using  
222 a nonlinear regression analysis of to obtain a line of best fit (with 95% CI) to which the  
223 intersect value of 0.2 was determined (Prism 5 or whatever version). One-way ANOVA  
224 followed by a Tukey's multiple comparisons test assuming an alpha of 0.05 was used to

225 test for statistical significant difference between antibody titer measurements. Cytokine  
226 readings are shown compared using descriptive statistics.

227

## 228 **Results**

229

### 230 **Standard curve comparing photon/s with CFU readout**

231 To compare bioluminescence read-out with actual bacterial burden, we first established a  
232 standard curve *in-vitro*. We applied IVIS® imaging to samples of JKD8049 pMV306  
233 hsp16+luxG13 in different dilutions and plated these on agar for CFU determination. We  
234 were able to interpolate a standard curve by nonlinear regression showing a very high  
235 positive correlation ( $r^2 = 0.98$ ) between photons/s and CFU/ml (Fig 1A).

236

### 237 **Establishment of mouse tail infection.**

238 In order to evaluate virulence and to study murine infection, bioluminescent *M. ulcerans*  
239 was injected subcutaneously into mouse tails. Ten BALB/c mice were inoculated with  
240  $3.3 \times 10^5$  CFU/ml *M. ulcerans* JKD8049 pMV306 hsp16+luxG13. This resulted in 90% (9  
241 out of 10) of mice presenting measurable light emission on IVIS®-images. Other than at  
242 the injection site at the tail, no other foci of infection as indicated by bioluminescence were  
243 observed (Fig 1B). Fifty percent (5 out of 10) gradually developed macroscopically  
244 apparent lesions resembling Buruli ulcer within 17 weeks (Fig 1C). None of the animals  
245 showed other signs of illness than skin lesion that were restricted to the approximate sites  
246 of injection.

247

## 248 **Course of the infection as measured by bioluminescence**

249 To study the course of the infection in terms of bacterial burden measured in  
250 bioluminescence, mice were imaged weekly with the IVIS® system. Bioluminescence,  
251 measured in emitted photons/s rose exponentially to a maximum of  $1 \times 10^7$  in week seven  
252 (Fig 1D), according to our standard curve, this equals about  $5 \times 10^6$  CFU/ml (Fig 1A) and  
253 was associated with advanced, severe pathology (Table 1). From this time-point on, the  
254 signal declined to a  $1 \times 10^5$  (corresponding to  $4 \times 10^4$  bacteria) threshold until the end of the  
255 experiment. At week eight, three mice reached humane endpoint and were culled. In  
256 examining the antibody titer levels against MU WCL, these began to rise in week 8,  
257 correlating with a decrease in photon/s counts. Animals displaying *severe* symptoms had  
258 higher photons/s counts, indicating higher bacterial burden, compared to those with  
259 *moderate* or no pathology. Photons/sec counts increased per week until week 6-8 when the  
260 infection seemed to plateau.

261

262 **Table 1: Overview of histopathological findings of mice subcutaneously infected with**  
263 **autoluminescent *M. ulcerans* into the tail.** Animals were divided by clinical pathology in  
264 severe pathology, moderate pathology and no pathology. Photons per second  
265 analyzed by IVIS-imaging are shown in comparison to histological results. The amount of  
266 photons/s as a proxy for bacterial quantity correlated with pathology except in mouse 87,  
267 where no clinical pathology was seen.

| Clinical picture                        | ID | BL-AUC    | AF B    | IN F    | TD M | VA S | Inflammatory cell type | Degree of inflammation      |
|-----------------------------------------|----|-----------|---------|---------|------|------|------------------------|-----------------------------|
| Severe pathology (sacrificed at week 8) | 84 | 1.36 E+08 | ++      | ++<br>+ | +++  | n/a  | PC, MΦ, LYM            | Severe, multifocal, chronic |
|                                         | 85 | 1.35 E+08 | ++<br>+ | ++<br>+ | +++  | n/a  | PC, MΦ, LYM, EOS       | Severe, multifocal, chronic |
|                                         | 88 | 1.72 E+07 | ++      | ++<br>+ | +++  | ++   | PC, MΦ, LYM            | Severe, multifocal, chronic |

|                           |    |              |    |     |     |    |                  |                                       |
|---------------------------|----|--------------|----|-----|-----|----|------------------|---------------------------------------|
| <b>Moderate pathology</b> | 86 | 1.97<br>E+06 | -  | +   | +   | +  | MΦ, LYM          | Mild to moderate, chronic, multifocal |
|                           | 89 | 3.69<br>E+06 | +  | +/+ | ++  | ++ | PC, MΦ           | Mild, diffuse, chronic                |
| <b>No macro pathology</b> | 81 | 2.15<br>E+06 | -  | +   | +   | -  | MΦ, LYM          | Moderate, chronic, focal              |
|                           | 82 | 6926<br>41   | -  | -   | -   | -  | -                | None                                  |
|                           | 83 | 8724<br>38   | -  | +   | +   | +  | MΦ, LYM          | Moderate, chronic, multifocal         |
|                           | 87 | 7.24<br>E+06 | ++ | ++  | +++ | ++ | PC, MΦ, LYM      | Locally severe, chronic               |
|                           | 90 | 0            | -  | +   | +   | +  | PC, MΦ, EOS, NEU | Mild, chronic, multifocal             |

268 ID, Identifier; BL-AUC, Bioluminescence in photons/s Area under the Curve; AFB, acid-fast bacilli, INF,  
 269 inflammation; TDM, tissue damage; VAS, vascular involvement; PC, Plasma cell; MΦ, Macrophage, LYM,  
 270 lymphocyte; EOS, eosinophil; NEU, neutrophil.

271

## 272 **Antibody titers**

273 To characterize the antibody-mediated immune response to *M. ulcerans*, we obtained  
 274 plasma samples for ELISA at weeks 2, 4, 7, 13 and 17 of the experiment. Over time, there  
 275 was a slight increase of antibody titers in response to *M. ulcerans* WCL but overall a late  
 276 onset of the antibody response was noted (Fig 2A). Antibody titers reached higher levels  
 277 between week 11 and 17, but overall titers, were low (Fig 2A). The response to *M. ulcerans*  
 278 Hsp18 and WCL was compared and no statistically significant difference ( $p > 0.05$ ) was  
 279 found (Fig 2B). Furthermore, ELISA results in response to WCL at week 8 were compared  
 280 between animals with severe, moderate and no clinical pathology and no statistically  
 281 significant difference ( $p > 0.05$ ) was found (Fig 2C,D).

282

## 283 **Late suppression of cytokines**

284 To characterize and study the cytokine profile in our murine *M. ulcerans* infection model,  
 285 intracellular cytokine staining was performed on spleen samples after eight and 17 weeks

286 of the experiment, when three mice were humanely killed. The cytokine concentrations in  
287 splenocyte samples re-stimulated with 2 $\mu$ g *M. ulcerans* JKD8049 WCL were compared  
288 between mice with pathology culled at week 8 and those with and without pathology culled  
289 at week 17 were compared. In the three mice that were culled prematurely due to rapidly  
290 extending disease in week 8, elevated levels of IFN- $\gamma$  and IL-10 were measured. Overall,  
291 cytokine levels were very low for all assayed cytokines in week 17 regardless of clinical  
292 state of the animal (Fig 3).

293

#### 294 **Histopathology of lesions**

295 In order to validate the model and study the pathology of *M. ulcerans*, histopathology was  
296 performed on skin lesions and compared to those of humans described in the literature.  
297 Specimens from infected tissue were subjected to histopathological analysis in Ziehl-  
298 Neelsen and H&E-staining. Aggregates of acid-fast bacilli, *M. ulcerans*, were observed at  
299 300 – 400  $\mu$ m beneath the epidermis (Fig 4A). Furthermore, epidermal hyperplasia and  
300 immune cell infiltrates were apparent (Fig. 4). Bioluminescence (photons/s) as proxy for  
301 bacterial quantity correlated well with the histological extent of disease except for mouse  
302 ID 87 (Table 1). Numerous acid-fast bacilli as well as severe, multifocal, chronic  
303 inflammation marked by presence of plasma cells, macrophages and lymphocytes were  
304 observed in mice with severe clinical pathology. There was extensive tissue damage, as  
305 well as vascular involvement in these animals. Mice with moderate clinical pathology  
306 exhibited mild and rather diffuse histological pictures and less tissue damage. Mice that  
307 had no obvious clinical signs of disease had low bioluminescence and showed moderate to  
308 little localized/focal histological features of inflammation (Table 1, Fig 4).

309

310 **Discussion**

311 In this study we have successfully applied the use of bioluminescent *M. ulcerans* JKD8049  
312 to develop a model that allows us to follow the immune response to *M. ulcerans* in BALB/c  
313 mice correlating with human Buruli ulcer disease. The onset of clinical signs was gradual  
314 and mice developed characteristic, localized lesions. Necrosis of the subcutis, chronic  
315 inflammation with the presence of macrophages and lymphocytes, granuloma formation,  
316 panniculitis as well as the and presence of AFBs correlating with disease progression are  
317 hallmarks of Buruli ulcer histopathology described in humans [49,50]. The extent and the  
318 overall of pathology observed in the mouse tail tissue in our study was comparable to the  
319 above-mentioned experience from human patients supporting the use of this mouse model  
320 to study Buruli ulcer.

321

322 The bioluminescent read-out correlated with the histopathological outcome in a dose-  
323 dependent manner, where an elevated photons/s counts, indicating high bacterial burden  
324 coincided with more progressive histological disease (Table 1) underlining the usefulness  
325 of IVIS®-imaging and bioluminescence as a marker for disease progression. The use of  
326 bioluminescent *M. ulcerans* permitted us to both verify the location of the bacteria as well  
327 as the growth rate in the lesion. After subcutaneous injection we observed presence of  
328 photon-emitting bacteria exclusively in the upper-third of the mouse tail, which was the  
329 site of injection.

330

331 We noticed a decline and plateauing of bioluminescence from week 8 onwards. This  
332 phenomenon could be explained by a plateauing of the bacterial growth curve in the lesion  
333 and transition into a stationary phase where less of the immunosuppressive toxin  
334 mycolactone is produced and partial host control sets in which is reflected to some extent  
335 by the rise of antibody titers around that time-point (Fig 2). The later phase of Buruli ulcer  
336 infection is characterized by granuloma formation and highly localized extracellular AFBs  
337 within these lesions. Also, a less active metabolic state during this phase could lead to  
338 decreased bioluminescence. Vasculopathy is a feature of Buruli ulcers observed in humans  
339 [49] and mice (Table 1, Fig 4). A hypoxic state within the lesion might also decrease  
340 bioluminescence and more research is needed to elucidate the usefulness of  
341 bioluminescence as a marker of bacterial quantity beyond approx. 8 weeks of infection in  
342 the BALB/c mouse.

343

#### 344 **Immunology and course of disease**

345 The immune response to *M. ulcerans* is influenced by the microbes' toxin, mycolactone.  
346 Dendritic cells (DC's) are inhibited by ML which can impair their ability to prime a cellular  
347 immune responses and phagocytose the bacteria [51]. Also, suppression of a CD4+  
348 immune response was observed in humans [52,53] and efficient mounting of a Th1  
349 response and elevated IFN- $\gamma$  seemed protective [54]. T-cells depletion, mediated by  
350 miRNAs has also been attributed to ML {GueninMace:2011bp}. It is believed that, like in  
351 tuberculosis, an effective cell-mediated immune responses can naturally control the  
352 infection and are likely also important for conferring transient protection against BU,  
353 experimentally [55]. Markedly elevated cytokines in human Buruli cases are IFN- $\gamma$  and



354 IL-10 [56]. IFN- $\gamma$  is known to be an early mediator of host response to *M. ulcerans* [57]  
355 and increases in patients after 4 – 8 weeks of antimicrobial treatment indicating  
356 immunocompetence against *M. ulcerans* and the mounting of a supportive CD4+ Th1-  
357 response [56]. The elevated IFN- $\gamma$  response seen in mice with severe pathology (Fig 3A)  
358 can thus be interpreted as an early reaction to a large amount of actively multiplying  
359 bacteria, whereas at week 17, mice with no pathology had higher IFN- $\gamma$  levels than those  
360 with pathology possibly due to sufficient host control of the pathogen. Consistently,  
361 patients with pre-ulcerative lesions (early-phase) and patients with healed lesions (host  
362 control) both showed elevated IFN- $\gamma$  levels [58] whilst IL-10 seems to be somewhat  
363 nonspecifically elevated during all phases of Buruli ulcer disease [54,56,58]

364

365 In our experiment, we noted a late onset of cell-mediated immunity in the mice infected  
366 with *M. ulcerans*. Antibody titres slowly rose, but only at week 7. Interestingly, the decline  
367 in photons/s and the increase in antibody titers coincided in week 7. It is not clear if rising  
368 antibody levels helped to gain control of the infection or if declining bacterial load resulted  
369 in less immune suppression by ML and led to a reactivation of the immune system and an  
370 increase of antibody levels. In humans, serological screening for Hsp18 antibodies  
371 indicates that large parts of the population in endemic areas are exposed to *M. ulcerans* but  
372 only some develop the disease [59]. Guinea pigs infected with *M. ulcerans* appear to self-  
373 heal as do some mice [60]. It is conceivable that humans infected with certain doses of *M.*  
374 *ulcerans* develop either no disease, limited disease, or even unnoticed disease that self-  
375 resolves. Evidence for these scenarios has been observed in Buruli ulcer patients who have  
376 defaulted from antibiotic treatment regimens, yet could still be contacted for follow-up and

377 showed to have healed lesions despite incomplete treatment [61]. It is likely, that the  
378 bacterial burden was not zero in these patients at the time of default but that it reached a  
379 critical nadir at which host immunity overcame the counteracting effect of mycolactone  
380 and controlled infection. Individuals that are able to establish an efficient immune response  
381 to MU might control and clear the infection unnoticed as was the case with 50% of  
382 subcutaneously infected mice in our experiment. We have previously deduced a low  
383 infectious dose 50% (ID50) of <10 CFU from experiments involving mechanical injury  
384 simulated by needle stick to *M. ulcerans* externally contaminated mouse tails. Even though  
385 in this current research bacterial presence was measured by IVIS® imaging in 90% of mice,  
386 only 50% of animals showed clinical disease in this experiment following subcutaneous  
387 injection with approx.  $5 \times 10^6$  CFU/ml. This observation and discrepancy with our previous  
388 research might be explained by the different handling of the inoculating needle,  
389 perpendicular, and supposedly deeper penetration in the study by Wallace et al. [9] and  
390 more superficial penetration in a 20-30° angle in subcutaneous injections in this study.  
391 Experiments are required to assess the *M. ulcerans* ID50 using carefully controlled  
392 inoculation conditions, perhaps using a micromanipulator with decreasing doses of *M.*  
393 *ulcerans*.

394

395 At week 8, three animals of the SC cohort had reached the humane experimental endpoint  
396 and were culled. Their cytokine profile data were comparable to those of the other animals  
397 culled at week 17 and provide an insight into the evolution of the cytokine profile. While  
398 there were considerable amounts of IFN- $\gamma$  and IL-10 indicating a Th1-mediated response  
399 observed in the animals sacrificed at week 8, all cytokine levels were reduced by week 17.

400 The suppression of cytokines is due to inhibition by ML of nascent membrane and secretory  
401 proteins egress through the ER membrane [6,62]. In human patients with Buruli ulcer,  
402 overall suppressed IFN- $\gamma$  levels are seen [54]. The triad of peak bacterial load with  
403 worsening pathology, low but rising antibody titers and elevated Th1 subset cytokines in  
404 week 7 could also explain the paradoxical response seen in patients; an overreaction and  
405 inflammation of the reactivating immune system noted in patients beginning antibiotics for  
406 Buruli ulcer [63]. Animals not showing clinical signs of disease had marginally higher  
407 antibodies levels against *M. ulcerans* (Fig 2) possibly indicating some sort of immune  
408 response to the infection, though the results were statistically not significant in our small  
409 sample.

410

411 We demonstrated virulence of the *M. ulcerans*+pMV306 hsp16+luxG13 reporter strain and  
412 observed localized clinical disease with human-like pathology in 50% of the animals after  
413 inoculation with  $5 \times 10^6$  CFU/ml bacteria. IVIS®-imaging of *M. ulcerans* infection can  
414 reduce and refine animal usage in Buruli ulcer research and enables further studies of into  
415 pathology of the disease as well as pre-clinical drug and vaccine evaluation.

417 **Acknowledgements**

418 We thank Rolfe Howlett and John Hayman and for help with analyzing and scoring the

419 histopathological results.

421 **References**

422

- 423 1. van der Werf TS, Stienstra Y, Johnson RC, Phillips R, Adjei O, Fleischer B, et al.  
424 Mycobacterium ulcerans disease. Bull World Health Organ. 2005;83: 785–791.
- 425 2. WHO. Buruli ulcer [Internet].
- 426 3. de Zeeuw J, Omansen TF, Douwstra M, Barogui YT, Agossadou C, Sopoh GE, et  
427 al. Persisting social participation restrictions among former Buruli ulcer patients in  
428 Ghana and Benin. Small PLC, editor. PLoS Negl Trop Dis. Public Library of  
429 Science; 2014;8: e3303. doi:10.1371/journal.pntd.0003303
- 430 4. George KM, Chatterjee D, Gunawardana G, Welty D, Hayman J, Lee R, et al.  
431 Mycolactone: a polyketide toxin from Mycobacterium ulcerans required for  
432 virulence. Science. 1999;283: 854–857.
- 433 5. George KM, Pascopella L, Welty DM, Small PL. A Mycobacterium ulcerans  
434 toxin, mycolactone, causes apoptosis in guinea pig ulcers and tissue culture cells.  
435 Infect Immun. 2000;68: 877–883.
- 436 6. Hall BS, Hill K, McKenna M, Ogbechi J, High S, Willis AE, et al. The pathogenic  
437 mechanism of the Mycobacterium ulcerans virulence factor, mycolactone, depends  
438 on blockade of protein translocation into the ER. Deretic V, editor. PLoS Pathog.  
439 2014;10: e1004061. doi:10.1371/journal.ppat.1004061
- 440 7. Demangel C, High S. Sec61 blockade by mycolactone: a central mechanism in  
441 Buruli ulcer disease. Biol Cell. 2018. doi:10.1111/boc.201800030
- 442 8. Stinear TP, Mve-Obiang A, Small PLC, Frigui W, Pryor MJ, Brosch R, et al. Giant  
443 plasmid-encoded polyketide synthases produce the macrolide toxin of

- 444           Mycobacterium ulcerans. Proc Natl Acad Sci USA. 2004;101: 1345–1349.  
445           doi:10.1073/pnas.0305877101
- 446    9.     Wallace JR, Mangas KM, Porter JL, Marcsisin R, Pidot SJ, Howden BO, et al.  
447           Mycobacterium ulcerans low infectious dose and atypical mechanical transmission  
448           support insect bites and puncturing injuries in the spread of Buruli ulcer. bioRxiv.  
449           Cold Spring Harbor Labs Journals; 2016;: 071753. doi:10.1101/071753
- 450    10.    Etuaful S, Carbonnelle B, Grosset J, Lucas S, Horsfield C, Phillips R, et al.  
451           Efficacy of the combination rifampin-streptomycin in preventing growth of  
452           Mycobacterium ulcerans in early lesions of Buruli ulcer in humans. Antimicrob  
453           Agents Chemother. American Society for Microbiology; 2005;49: 3182–3186.  
454           doi:10.1128/AAC.49.8.3182-3186.2005
- 455    11.    Nienhuis WA, Stienstra Y, Thompson WA, Awuah PC, Abass KM, Tuah W, et al.  
456           Antimicrobial treatment for early, limited Mycobacterium ulcerans infection: a  
457           randomised controlled trial. Lancet. 2010;375: 664–672. doi:10.1016/S0140-  
458           6736(09)61962-0
- 459    12.    Kibadi K, Boelaert M, Fraga AG, Kayinua M, Longatto-Filho A, Minuku J-B, et  
460           al. Response to treatment in a prospective cohort of patients with large ulcerated  
461           lesions suspected to be Buruli Ulcer (Mycobacterium ulcerans disease). Phillips  
462           RO, editor. PLoS Negl Trop Dis. 2010;4: e736. doi:10.1371/journal.pntd.0000736
- 463    13.    Wadagni AC, Barogui YT, Johnson RC, Sopoh GE, Affolabi D, van der Werf TS,  
464           et al. Delayed versus standard assessment for excision surgery in patients with  
465           Buruli ulcer in Benin: a randomised controlled trial. Lancet Infect Dis. 2018;18:  
466           650–656. doi:10.1016/S1473-3099(18)30160-9

- 467 14. Coutanceau E, Legras P, Marsollier L, Reysset G, Cole ST, Demangel C.  
468 Immunogenicity of Mycobacterium ulcerans Hsp65 and protective efficacy of a  
469 Mycobacterium leprae Hsp65-based DNA vaccine against Buruli ulcer. *Microbes*  
470 *Infect.* 2006;8: 2075–2081. doi:10.1016/j.micinf.2006.03.009
- 471 15. Watanabe M, Nakamura H, Nabekura R, Shinoda N, Suzuki E, Saito H. Protective  
472 effect of a dewaxed whole-cell vaccine against Mycobacterium ulcerans infection  
473 in mice. *Vaccine.* 2015;33: 2232–2239. doi:10.1016/j.vaccine.2015.03.046
- 474 16. Bolz M, Kerber S, Zimmer G, Pluschke G. Use of Recombinant Virus Replicon  
475 Particles for Vaccination against Mycobacterium ulcerans Disease. Johnson C,  
476 editor. *PLoS Negl Trop Dis.* 2015;9: e0004011. doi:10.1371/journal.pntd.0004011
- 477 17. Hart BE, Hale LP, Lee S. Recombinant BCG Expressing Mycobacterium ulcerans  
478 Ag85A Imparts Enhanced Protection against Experimental Buruli ulcer. Johnson  
479 C, editor. *PLoS Negl Trop Dis.* 2015;9: e0004046.  
480 doi:10.1371/journal.pntd.0004046
- 481 18. Bolz M, Bénard A, Dreyer AM, Kerber S, Vettiger A, Oehlmann W, et al.  
482 Vaccination with the Surface Proteins MUL\_2232 and MUL\_3720 of  
483 Mycobacterium ulcerans Induces Antibodies but Fails to Provide Protection  
484 against Buruli Ulcer. Small PLC, editor. *PLoS Negl Trop Dis.* 2016;10: e0004431.  
485 doi:10.1371/journal.pntd.0004431
- 486 19. Bénard A, Sala C, Pluschke G. Mycobacterium ulcerans Mouse Model Refinement  
487 for Pre-Clinical Profiling of Vaccine Candidates. Cardona P-J, editor. *PLoS ONE.*  
488 2016;11: e0167059. doi:10.1371/journal.pone.0167059
- 489 20. Hart BE, Lee S. Overexpression of a Mycobacterium ulcerans Ag85B-EsxH

- 490 Fusion Protein in Recombinant BCG Improves Experimental Buruli Ulcer Vaccine  
491 Efficacy. Pluschke G, editor. PLoS Negl Trop Dis. 2016;10: e0005229.  
492 doi:10.1371/journal.pntd.0005229
- 493 21. Smith PG, Revill WD, Lukwago E, Rykushin YP. The protective effect of BCG  
494 against Mycobacterium ulcerans disease: a controlled trial in an endemic area of  
495 Uganda. Trans R Soc Trop Med Hyg. 1976;70: 449–457.
- 496 22. BCG vaccination against mycobacterium ulcerans infection (Buruli ulcer). First  
497 results of a trial in Uganda. Lancet. 1969;1: 111–115.
- 498 23. Einarsdottir T, Huygen K. Buruli ulcer. Hum Vaccin. 2011;7: 1198–1203.  
499 doi:10.4161/hv.7.11.17751
- 500 24. Dega H, Robert J, Bonnafous P, Jarlier V, Grosset J. Activities of several  
501 antimicrobials against Mycobacterium ulcerans infection in mice. Antimicrob  
502 Agents Chemother. American Society for Microbiology (ASM); 2000;44: 2367–  
503 2372.
- 504 25. Bentoucha A, Robert J, Dega H, Lounis N, Jarlier V, Grosset J. Activities of new  
505 macrolides and fluoroquinolones against Mycobacterium ulcerans infection in  
506 mice. Antimicrob Agents Chemother. American Society for Microbiology;  
507 2001;45: 3109–3112. doi:10.1128/AAC.45.11.3109-3112.2001
- 508 26. Dega H, Bentoucha A, Robert J, Jarlier V, Grosset J. Bactericidal activity of  
509 rifampin-amikacin against Mycobacterium ulcerans in mice. Antimicrob Agents  
510 Chemother. American Society for Microbiology (ASM); 2002;46: 3193–3196.  
511 doi:10.1128/AAC.46.10.3193-3196.2002
- 512 27. Marsollier L, Robert R, Aubry J, Saint André J-P, Kouakou H, Legras P, et al.



- 513 Aquatic insects as a vector for *Mycobacterium ulcerans*. *Appl Environ Microbiol.*  
514 2002;68: 4623–4628.
- 515 28. Shepard CC. THE EXPERIMENTAL DISEASE THAT FOLLOWS THE  
516 INJECTION OF HUMAN LEPROSY BACILLI INTO FOOT-PADS OF MICE. *J*  
517 *Exp Med.* 1960;112: 445–454.
- 518 29. Tanghe A, Dangy J-P, Pluschke G, Huygen K. Improved protective efficacy of a  
519 species-specific DNA vaccine encoding mycolyl-transferase Ag85A from  
520 *Mycobacterium ulcerans* by homologous protein boosting. Small PLC, editor.  
521 *PLoS Negl Trop Dis.* 2008;2: e199. doi:10.1371/journal.pntd.0000199
- 522 30. Tanghe A, Adnet P-Y, Gartner T, Huygen K. A booster vaccination with  
523 *Mycobacterium bovis* BCG does not increase the protective effect of the vaccine  
524 against experimental *Mycobacterium ulcerans* infection in mice. *Infect Immun.*  
525 2007;75: 2642–2644. doi:10.1128/IAI.01622-06
- 526 31. Dhople AM, Namba K. Activities of sitafloxacin (DU-6859a), either singly or in  
527 combination with rifampin, against *Mycobacterium ulcerans* infection in mice. *J*  
528 *Chemother.* 2003;15: 47–52. doi:10.1179/joc.2003.15.1.47
- 529 32. Converse PJ, Almeida DV, Tasneen R, Saini V, Tyagi S, Ammerman NC, et al.  
530 Shorter-course treatment for *Mycobacterium ulcerans* disease with high-dose  
531 rifamycins and clofazimine in a mouse model of Buruli ulcer. Small PLC, editor.  
532 *PLoS Negl Trop Dis.* 2018;12: e0006728. doi:10.1371/journal.pntd.0006728
- 533 33. Converse PJ, Xing Y, Kim KH, Tyagi S, Li S-Y, Almeida DV, et al. Accelerated  
534 detection of mycolactone production and response to antibiotic treatment in a  
535 mouse model of *Mycobacterium ulcerans* disease. Phillips RO, editor. *PLoS Negl*

- 536 Trop Dis. 2014;8: e2618. doi:10.1371/journal.pntd.0002618
- 537 34. Sarfo FS, Converse PJ, Almeida DV, Zhang J, Robinson C, Wansbrough-Jones M,  
538 et al. Microbiological, histological, immunological, and toxin response to  
539 antibiotic treatment in the mouse model of Mycobacterium ulcerans disease. Small  
540 PLC, editor. PLoS Negl Trop Dis. 2013;7: e2101.  
541 doi:10.1371/journal.pntd.0002101
- 542 35. Converse PJ, Almeida DV, Nuermberger EL, Grosset JH. BCG-mediated  
543 protection against Mycobacterium ulcerans infection in the mouse. Roy CR, editor.  
544 PLoS Negl Trop Dis. 2011;5: e985. doi:10.1371/journal.pntd.0000985
- 545 36. Zhang T, Li S-Y, Converse PJ, Almeida DV, Grosset JH, Nuermberger EL. Using  
546 bioluminescence to monitor treatment response in real time in mice with  
547 Mycobacterium ulcerans infection. Antimicrob Agents Chemother. 2011;55: 56–  
548 61. doi:10.1128/AAC.01260-10
- 549 37. Zhang T, Bishai WR, Grosset JH, Nuermberger EL. Rapid assessment of  
550 antibacterial activity against Mycobacterium ulcerans by using recombinant  
551 luminescent strains. Antimicrob Agents Chemother. 2010;54: 2806–2813.  
552 doi:10.1128/AAC.00400-10
- 553 38. Almeida D, Converse PJ, Ahmad Z, Dooley KE, Nuermberger EL, Grosset JH.  
554 Activities of rifampin, Rifapentine and clarithromycin alone and in combination  
555 against mycobacterium ulcerans disease in mice. Diemert DJ, editor. PLoS Negl  
556 Trop Dis. 2011;5: e933. doi:10.1371/journal.pntd.0000933
- 557 39. Almeida DV, Converse PJ, Li S-Y, Tyagi S, Nuermberger EL, Grosset JH.  
558 Bactericidal activity does not predict sterilizing activity: the case of rifapentine in

- 559 the murine model of Mycobacterium ulcerans disease. Johnson C, editor. PLoS  
560 Negl Trop Dis. 2013;7: e2085. doi:10.1371/journal.pntd.0002085
- 561 40. Converse PJ, Tyagi S, Xing Y, Li S-Y, Kishi Y, Adamson J, et al. Efficacy of  
562 Rifampin Plus Clofazimine in a Murine Model of Mycobacterium ulcerans  
563 Disease. Phillips RO, editor. PLoS Negl Trop Dis. 2015;9: e0003823.  
564 doi:10.1371/journal.pntd.0003823
- 565 41. Zhang T, Li S-Y, Converse PJ, Grosset JH, Nuermberger EL. Rapid, serial, non-  
566 invasive assessment of drug efficacy in mice with autoluminescent Mycobacterium  
567 ulcerans infection. Ricaldi JN, editor. PLoS Negl Trop Dis. 2013;7: e2598.  
568 doi:10.1371/journal.pntd.0002598
- 569 42. Yerramilli A, Tay EL, Stewardson AJ, Kelley PG, Bishop E, Jenkin GA, et al. The  
570 location of Australian Buruli ulcer lesions-Implications for unravelling disease  
571 transmission. Pluschke G, editor. PLoS Negl Trop Dis. 2017;11: e0005800.  
572 doi:10.1371/journal.pntd.0005800
- 573 43. Omansen TF, Porter JL, Johnson PDR, van der Werf TS, Stienstra Y, Stinear TP.  
574 In-vitro activity of avermectins against Mycobacterium ulcerans. Johnson C,  
575 editor. PLoS Negl Trop Dis. Public Library of Science; 2015;9: e0003549.  
576 doi:10.1371/journal.pntd.0003549
- 577 44. Wallace JR, Mangas KM, Porter JL, Marcsisin R, Pidot SJ, Howden B, et al.  
578 Mycobacterium ulcerans low infectious dose and mechanical transmission support  
579 insect bites and puncturing injuries in the spread of Buruli ulcer. Azman AS,  
580 editor. PLoS Negl Trop Dis. 2017;11: e0005553.  
581 doi:10.1371/journal.pntd.0005553

- 582 45. Zhang T, Li S-Y, Nuermberger EL. Autoluminescent *Mycobacterium tuberculosis*  
583 for rapid, real-time, non-invasive assessment of drug and vaccine efficacy. Tyagi  
584 AK, editor. PLoS ONE. 2012;7: e29774. doi:10.1371/journal.pone.0029774
- 585 46. Andreu N, Zelmer A, Fletcher T, Elkington PT, Ward TH, Ripoll J, et al.  
586 Optimisation of bioluminescent reporters for use with mycobacteria. Doherty TM,  
587 editor. PLoS ONE. 2010;5: e10777. doi:10.1371/journal.pone.0010777
- 588 47. Andreu N, Zelmer A, Sampson SL, Ikeh M, Bancroft GJ, Schaible UE, et al. Rapid  
589 in vivo assessment of drug efficacy against *Mycobacterium tuberculosis* using an  
590 improved firefly luciferase. J Antimicrob Chemother. 2013;68: 2118–2127.  
591 doi:10.1093/jac/dkt155
- 592 48. Hong H, Gates PJ, Staunton J, Stinear T, Cole ST, Leadlay PF, et al. Identification  
593 using LC-MSn of co-metabolites in the biosynthesis of the polyketide toxin  
594 mycolactone by a clinical isolate of *Mycobacterium ulcerans*. Chem Commun  
595 (Camb). 2003;: 2822–2823.
- 596 49. Guarner J, Bartlett J, Whitney EAS, Raghunathan PL, Stienstra Y, Asamo K, et  
597 al. Histopathologic features of *Mycobacterium ulcerans* infection. Emerging Infect  
598 Dis. 2003;9: 651–656.
- 599 50. Rondini S, Horsfield C, Mensah-Quainoo E, Junghanss T, Lucas S, Pluschke G.  
600 Contiguous spread of *Mycobacterium ulcerans* in Buruli ulcer lesions analysed by  
601 histopathology and real-time PCR quantification of mycobacterial DNA. J Pathol.  
602 2006;208: 119–128. doi:10.1002/path.1864
- 603 51. Coutanceau E, Decalf J, Martino A, Babon A, Winter N, Cole ST, et al. Selective  
604 suppression of dendritic cell functions by *Mycobacterium ulcerans* toxin

- 605 mycolactone. *J Exp Med.* 2007;204: 1395–1403. doi:10.1084/jem.20070234
- 606 52. Phillips R, Sarfo FS, Guenin-Macé L, Decalf J, Wansbrough-Jones M, Albert ML,  
607 et al. Immunosuppressive signature of cutaneous *Mycobacterium ulcerans*  
608 infection in the peripheral blood of patients with buruli ulcer disease. *J Infect Dis.*  
609 2009;200: 1675–1684. doi:10.1086/646615
- 610 53. Boulkroun S, Guenin-Macé L, Thoulouze M-I, Monot M, Merckx A, Langsley G,  
611 et al. Mycolactone suppresses T cell responsiveness by altering both early  
612 signaling and posttranslational events. *J Immunol.* 2010;184: 1436–1444.  
613 doi:10.4049/jimmunol.0902854
- 614 54. Gooding TM, Johnson PDR, Smith M, Kemp AS, Robins-Browne RM. Cytokine  
615 profiles of patients infected with *Mycobacterium ulcerans* and unaffected  
616 household contacts. *Infect Immun.* 2002;70: 5562–5567.
- 617 55. Fraga AG, Martins TG, Torrado E, Huygen K, Portaels F, Silva MT, et al. Cellular  
618 immunity confers transient protection in experimental Buruli ulcer following BCG  
619 or mycolactone-negative *Mycobacterium ulcerans* vaccination. Manganelli R,  
620 editor. *PLoS ONE.* 2012;7: e33406. doi:10.1371/journal.pone.0033406
- 621 56. Sarfo FS, Phillips RO, Ampadu E, Sarpong F, Adentwe E, Wansbrough-Jones M.  
622 Dynamics of the cytokine response to *Mycobacterium ulcerans* during antibiotic  
623 treatment for *M. ulcerans* disease (Buruli ulcer) in humans. *Clin Vaccine Immunol.*  
624 2009;16: 61–65. doi:10.1128/CVI.00235-08
- 625 57. Bieri R, Bolz M, Ruf M-T, Pluschke G. Interferon- $\gamma$  Is a Crucial Activator of Early  
626 Host Immune Defense against *Mycobacterium ulcerans* Infection in Mice. Johnson  
627 C, editor. *PLoS Negl Trop Dis.* 2016;10: e0004450.

- 628           doi:10.1371/journal.pntd.0004450
- 629   58.   Schipper HS, Rutgers B, Huitema MG, Etuaful SN, Westenbrink BD, Limburg PC,  
630           et al. Systemic and local interferon-gamma production following *Mycobacterium*  
631           ulcerans infection. *Clin Exp Immunol.* 2007;150: 451–459. doi:10.1111/j.1365-  
632           2249.2007.03506.x
- 633   59.   Diaz D, Döbeli H, Yeboah-Manu D, Mensah-Quainoo E, Friedlein A, Soder N, et  
634           al. Use of the immunodominant 18-kiloDalton small heat shock protein as a  
635           serological marker for exposure to *Mycobacterium ulcerans*. *Clin Vaccine*  
636           *Immunol.* 2006;13: 1314–1321. doi:10.1128/CVI.00254-06
- 637   60.   Silva-Gomes R, Marcq E, Trigo G, Gonçalves CM, Longatto-Filho A, Castro AG,  
638           et al. Spontaneous Healing of *Mycobacterium ulcerans* Lesions in the Guinea Pig  
639           Model. Johnson C, editor. *PLoS Negl Trop Dis.* 2015;9: e0004265.  
640           doi:10.1371/journal.pntd.0004265
- 641   61.   Klis S, Kingma RA, Tuah W, van der Werf TS, Stienstra Y. Clinical outcomes of  
642           Ghanaian Buruli ulcer patients who defaulted from antimicrobial therapy. *Trop*  
643           *Med Int Health.* 2016;21: 1191–1196. doi:10.1111/tmi.12745
- 644   62.   Simmonds RE, Lali FV, Smallie T, Small PLC, Foxwell BM. Mycolactone inhibits  
645           monocyte cytokine production by a posttranscriptional mechanism. *J Immunol.*  
646           2009;182: 2194–2202. doi:10.4049/jimmunol.0802294
- 647   63.   Nienhuis WA, Stienstra Y, Abass KM, Tuah W, Thompson WA, Awuah PC, et al.  
648           Paradoxical responses after start of antimicrobial treatment in *Mycobacterium*  
649           ulcerans infection. *Clin Infect Dis.* 2012;54: 519–526. doi:10.1093/cid/cir856
- 650

651 **Figure legends**

652 **Figure 1. Use of bioluminescent *M. ulcerans* to follow the evolution of disease in the**  
653 **mouse tail model of Buruli ulcer.** (A) Standard curve comparing bioluminescence and  
654 colony-forming units (CFU) of the *M. ulcerans* JKD8049 +pMV306 hsp16 luxG13  
655 reporter strain. (B) IVIS®- (left) and photographic images (right) from BALB/c mice  
656 infected via subcutaneous tail inoculation with approx.  $3.3 \times 10^5$  CFU/ml *M. ulcerans*  
657 harboring the bioluminescent reporter plasmid. Photons/s emitted from bioluminescent  
658 bacteria were detected by IVIS® in anesthetized mice. Results are represented in a pseudo-  
659 colored scheme (red indicated high, yellow medium and green low intensity of light  
660 emitted). Light was detected from both the dorsal (site of injection) and ventral aspects of  
661 the mouse tail. The photos were taken at 4 weeks post infection; the bioluminescence read-  
662 out was  $1.8 \times 10^6$  photons, corresponding to approx.  $6.7 \times 10^5$  CFU/ml according to our  
663 standard curve. (C) Survival-graph representing time to detectable bioluminescence  
664 emission from mice infected with bioluminescent *M. ulcerans* into the tail (D)  
665 Development of mean photons/s emitted from mice infected with  $3.3 \times 10^5$  bioluminescent  
666 *M. ulcerans* into the upper third of the dorsal tail. Values represent the mean of dorsal and  
667 ventral photons/s measurement. Animals were sub-grouped for analysis by clinical staging  
668 based on severity of the gross pathology (*severe*: redness, swelling, edema, impending  
669 ulceration; *moderate*: redness, edema; and no pathology).

670

671 **Figure 2. Evolution of the antibody titer against *M. ulcerans* whole cell lysate (WCL)**  
672 **and small heat shock protein 18 (Hsp18) measured in plasma from mice infected with**  
673 ***M. ulcerans* over time.** A late onset of overall antibody response against an unspecific *M.*

674 *ulcerans* whole cell lysate was noted in the bioluminescent *M. ulcerans* tail infection model.  
675 Antibody titers rose late, after 8 weeks and plateaued at week 13 (A). No difference ( $p >$   
676 0.5) was observed in the antibody titer against small heat-shock protein 18 (Hsp 18) and  
677 whole cell lysate (B). No statistically significance in antibody levels was seen between  
678 animals with severe, moderate or no apparent pathology ( $p > 0.5$ ; C).

679

680 **Figure 3: Comparison of cytokine profile assessed by intracellular cytokine staining**  
681 **(ICS) of mice infected with *M. ulcerans* after 8 (A) and 17 (B) weeks of infection to**  
682 **naïve, non-infected mice.** Error bars represent standard error of the mean. Mice with  
683 advanced clinical pathology sacrificed at week eight of the experiment displayed highly  
684 elevated IFN- $\gamma$ , as well as IL-6 and IL-10 levels (A). IFN- $\gamma$  is known to activate  
685 macrophages and is a key regulator in granuloma formation in mycobacterial infections.  
686 At week 17, infected mice with no apparent pathology had higher IFN- $\gamma$  counts than other  
687 mice, as well as slightly elevated IL-2 levels.

688

689 **Figure 4: Histological specimens of mice infected with *M. ulcerans* into the tail in**  
690 **Hematoxylin and Eosin (H&E; A1,B1,C1,D1) or Ziel-Neelsen (ZN; A2,B2, C2,D2)**  
691 **staining.** (A) Whole slide cross-section of mouse tail (ID #85) infected with *M. ulcerans*  
692 subcutaneously, humanely killed eight weeks' post-infection due to advanced clinical  
693 pathology. Visible, are clusters of acid-fast bacilli and in the cutis and subcutis, approx.  
694 300-400  $\mu\text{m}$  beneath the surface. (B.1 and B.2) Example of presence of AFB in mouse #  
695 85, as well as granuloma formation. (C.1 and C2.) Normal mouse tail histology of a naïve,  
696 uninfected mouse with thin epidermis and intact hair follicles. (D.1 and D.2) Moderate



697 pathology (mouse #89) with diffuse inflammation, tissue damage and presence of AFB.  
698 (E1,E2) Necrosis, granuloma formation, inflammation and abundant extracellular  
699 clustering of AFB was observed in mice with severe pathology (mouse #84).

**A****Standard curve bioluminescence / CFU**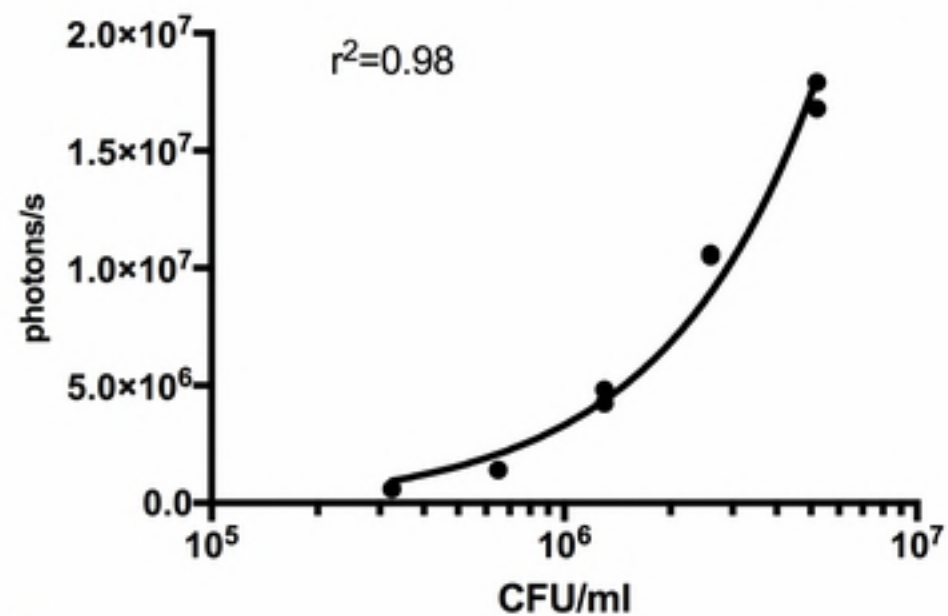**B**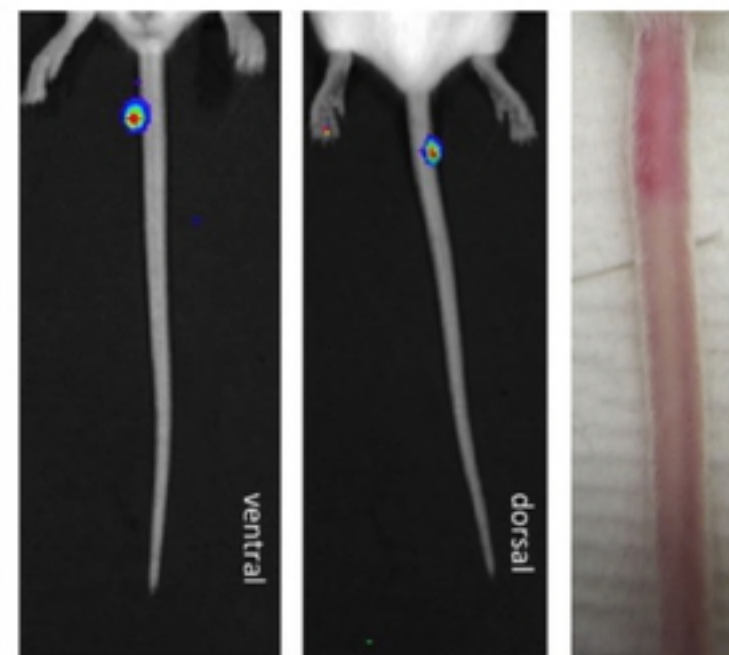**C****BL detection in mice infected with  $5 \times 10^6$  AL-MU via IVIS®**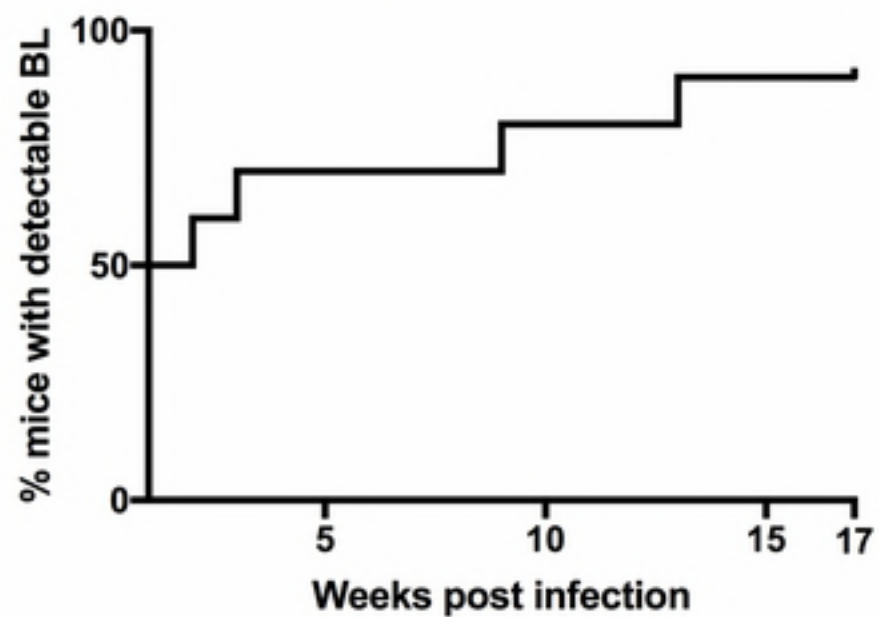**D**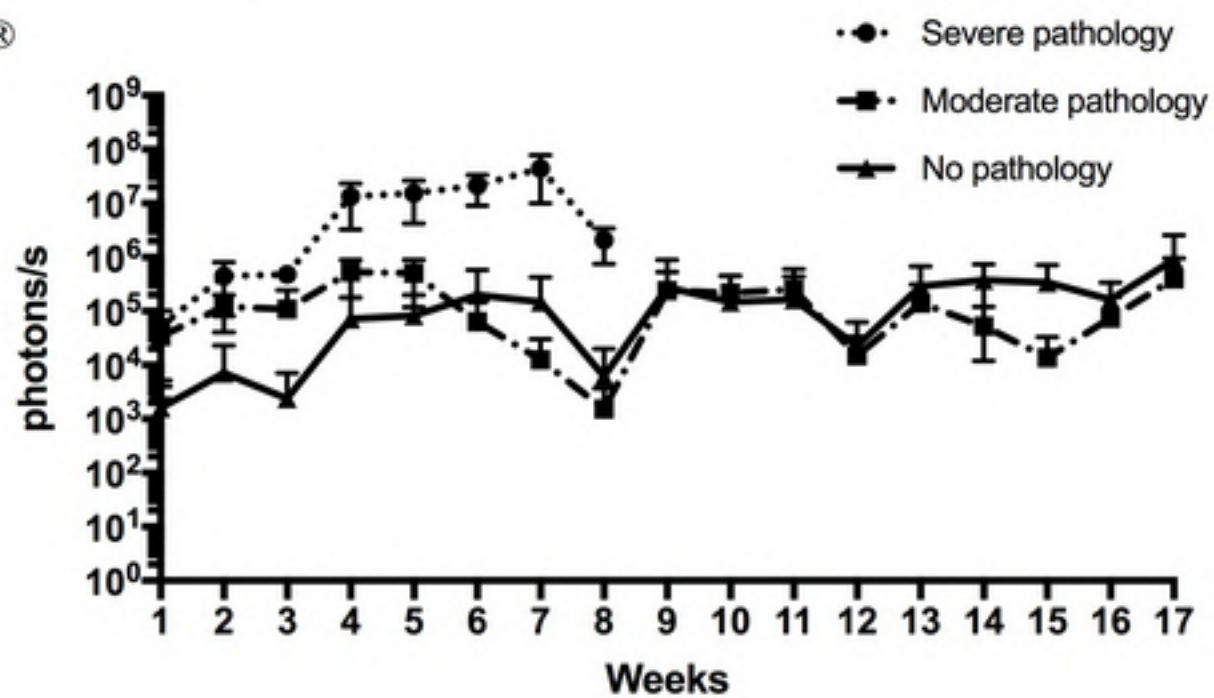

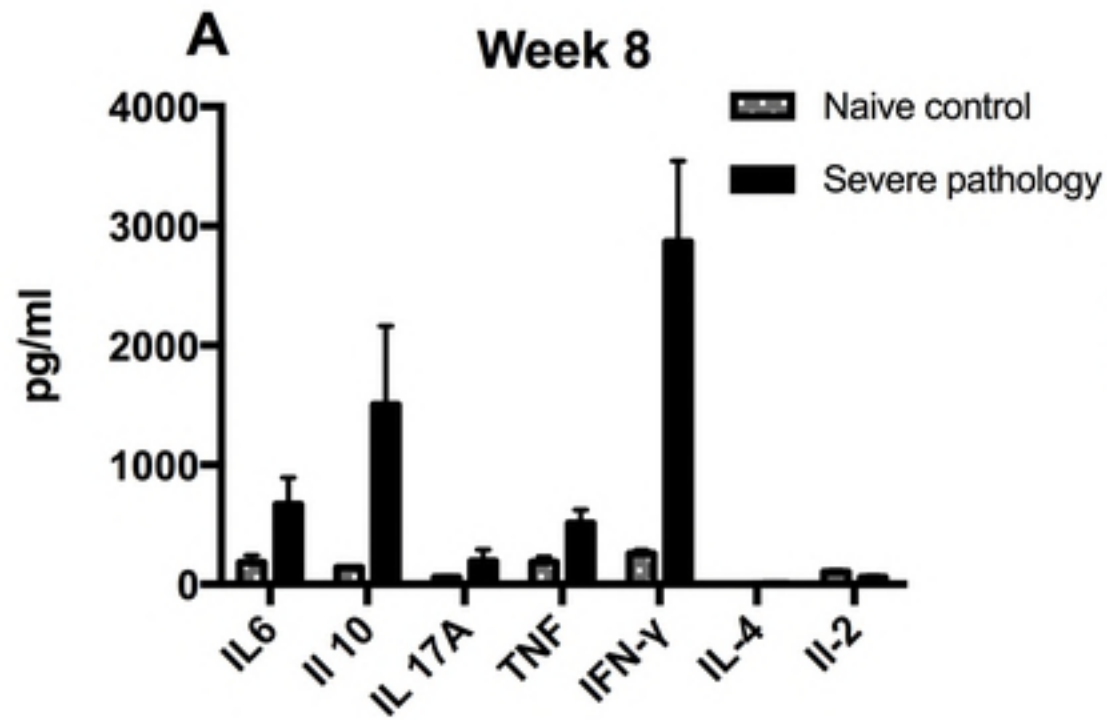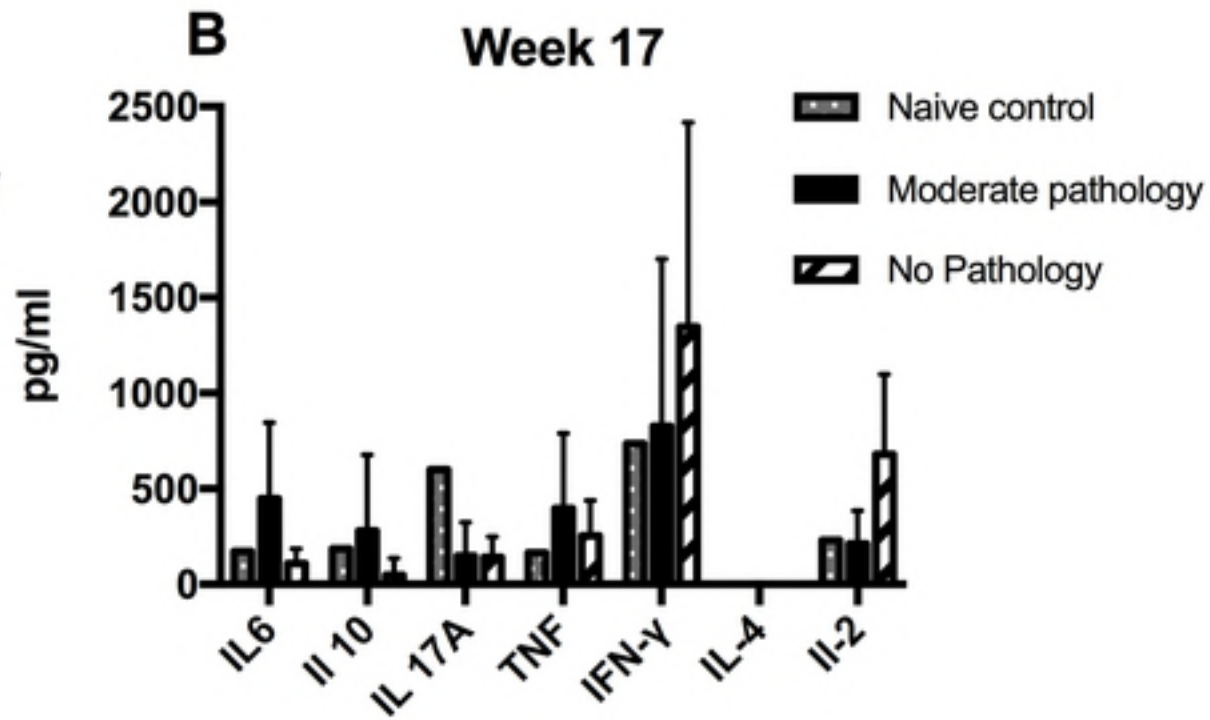

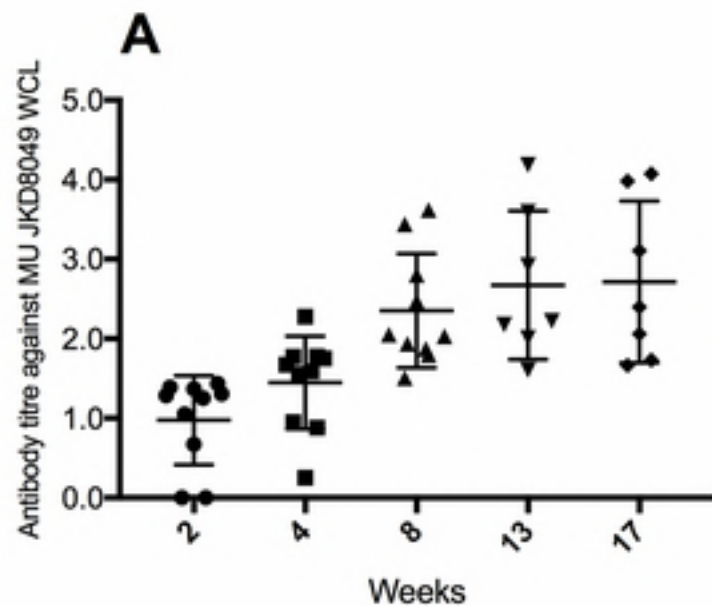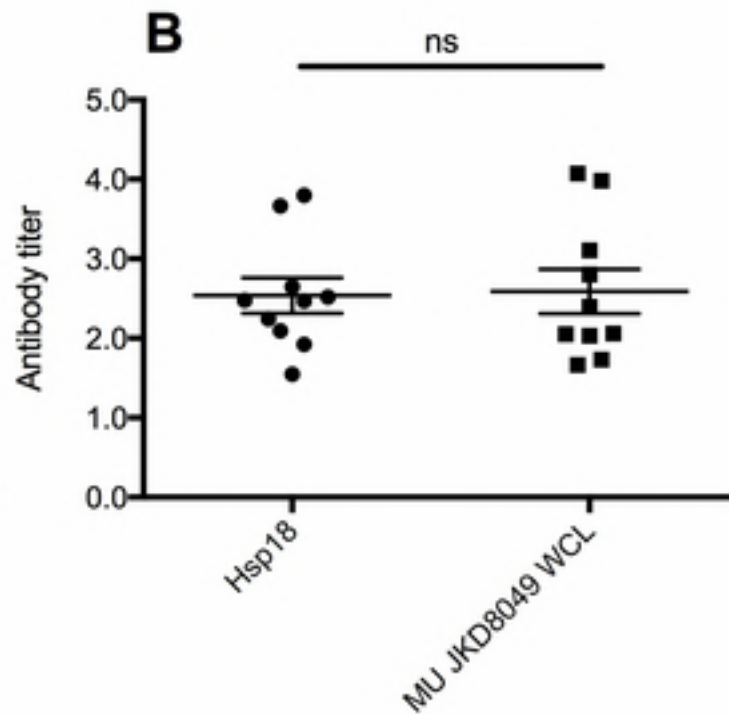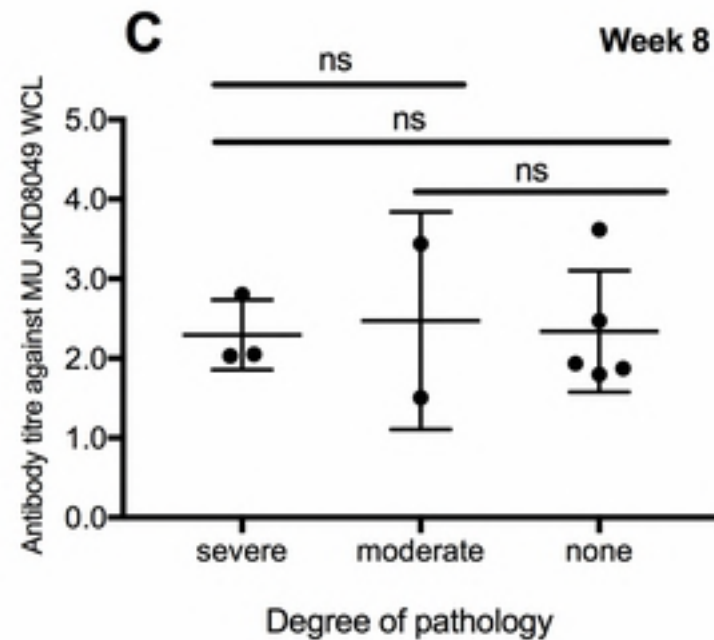



**A**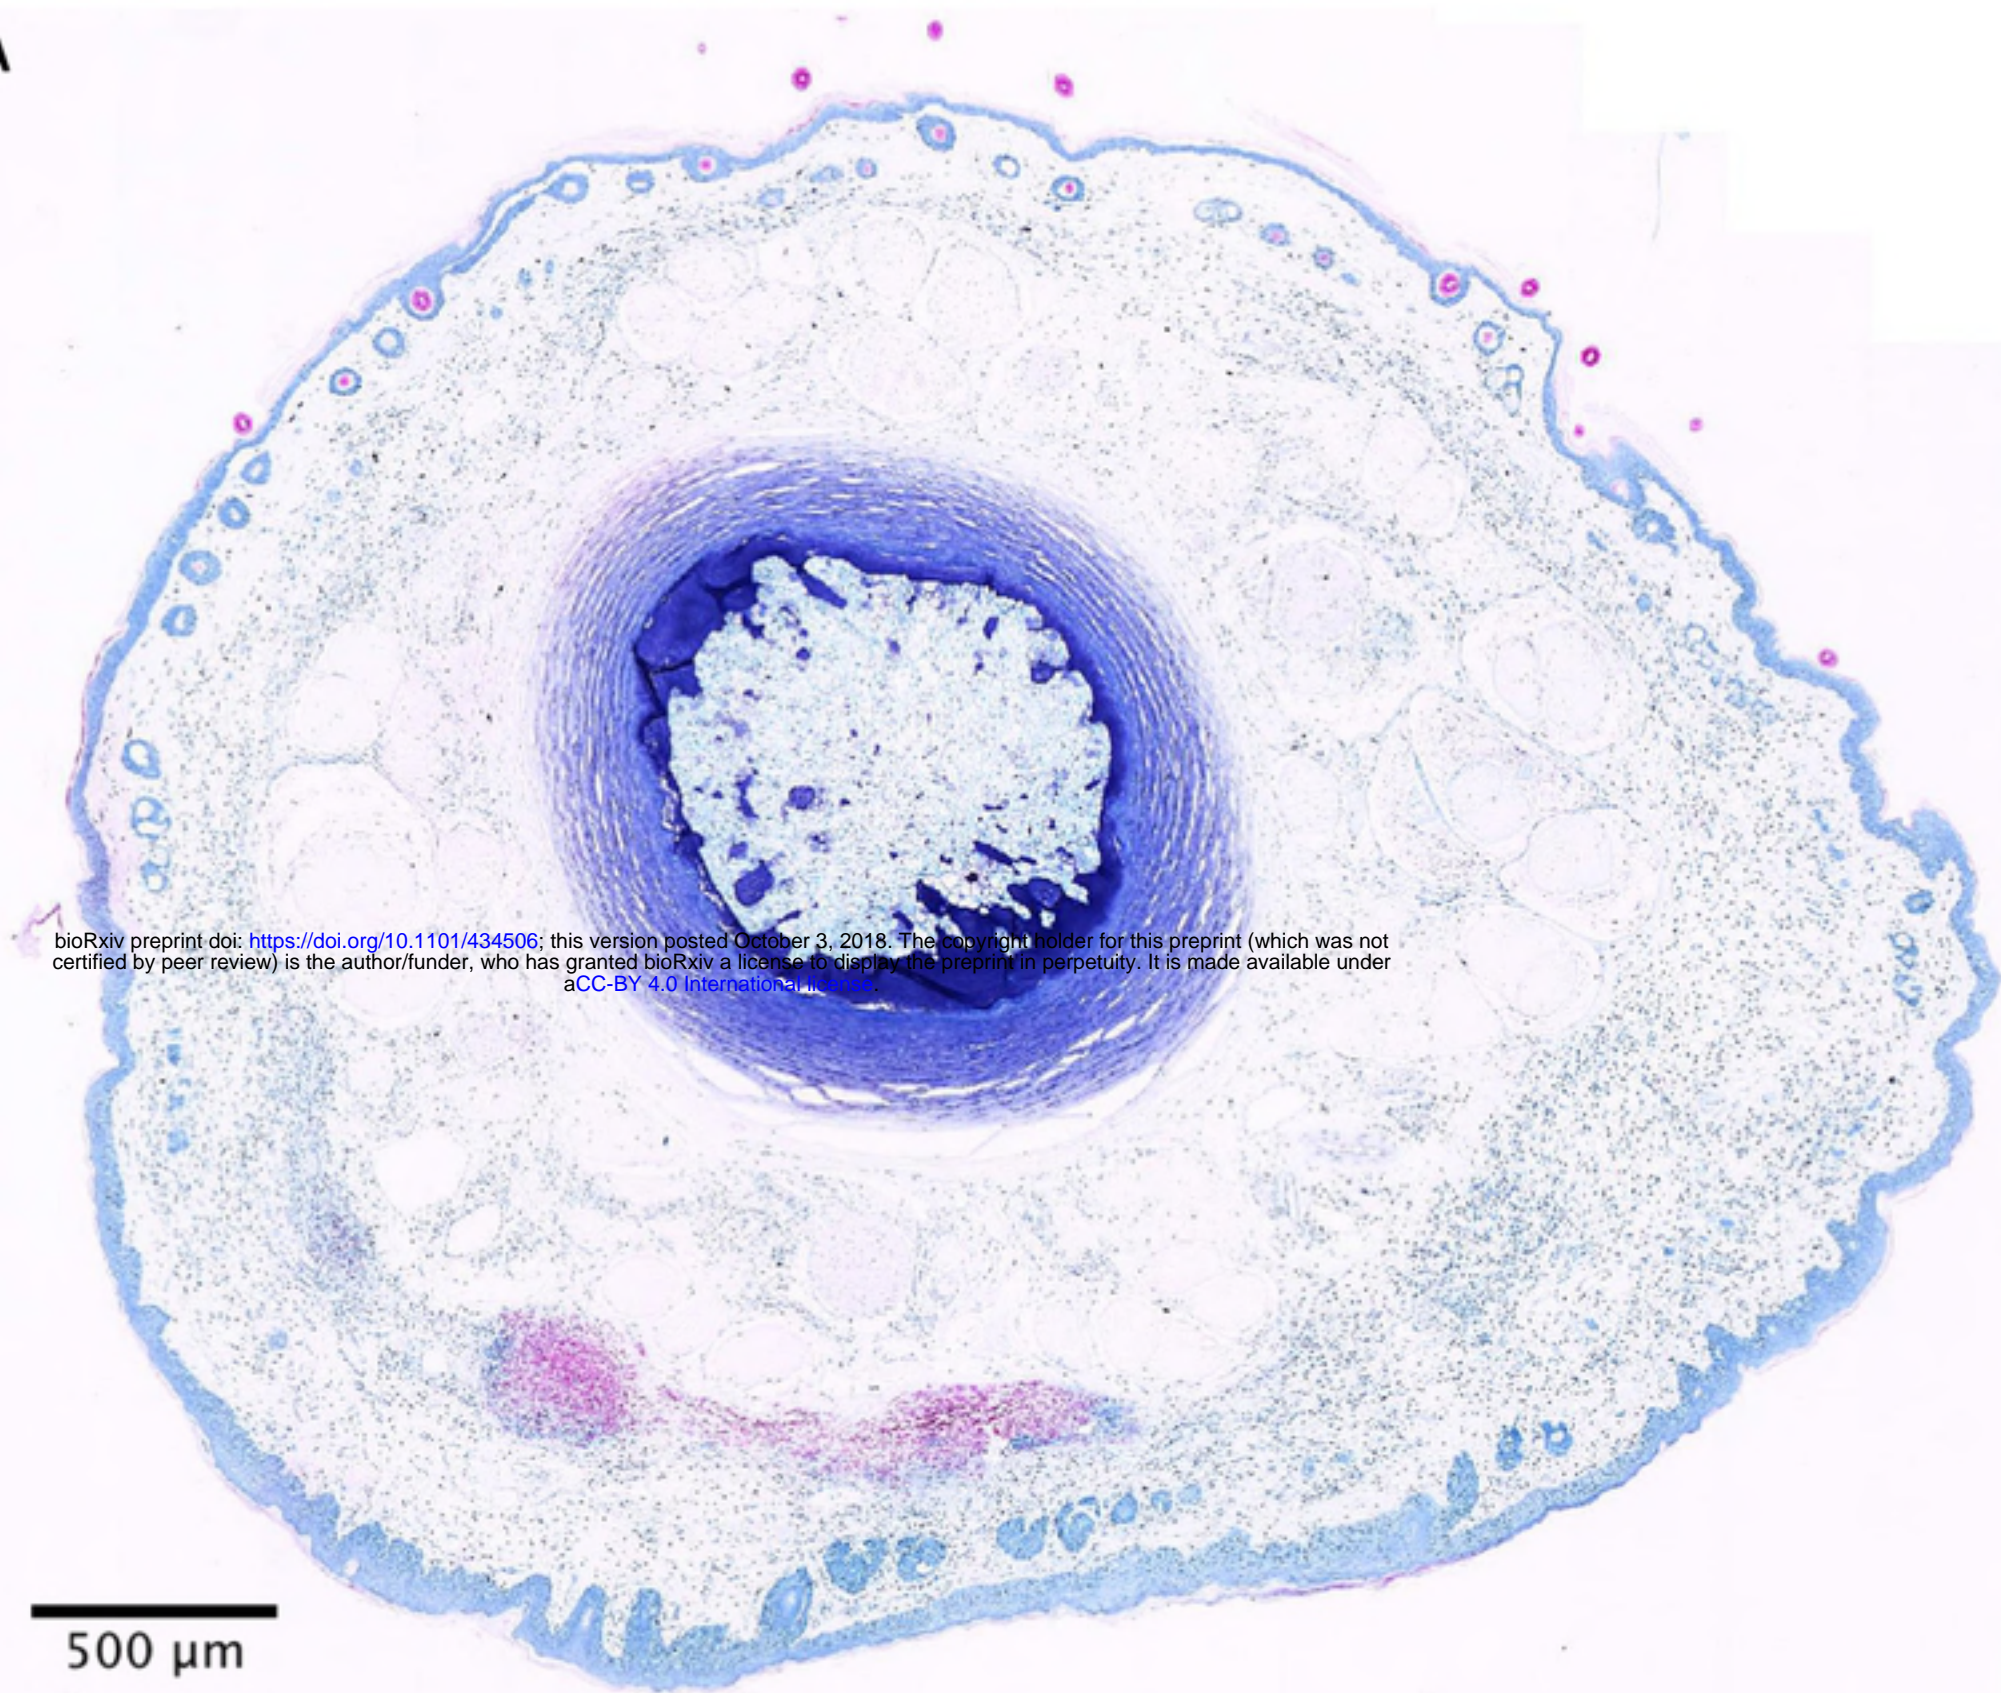**B.1**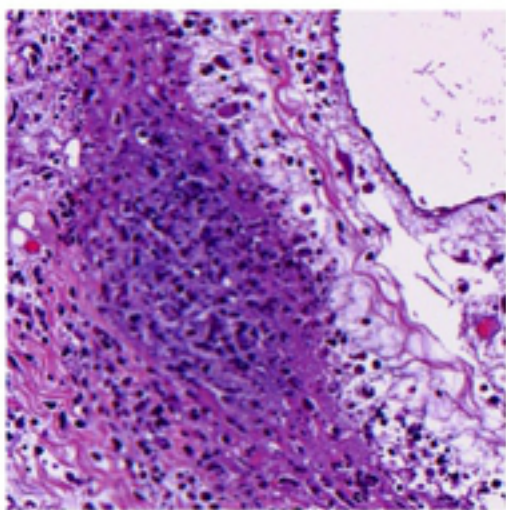**B.2**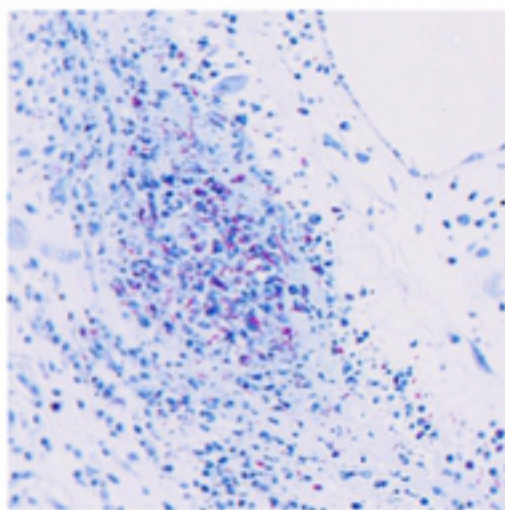**C.1**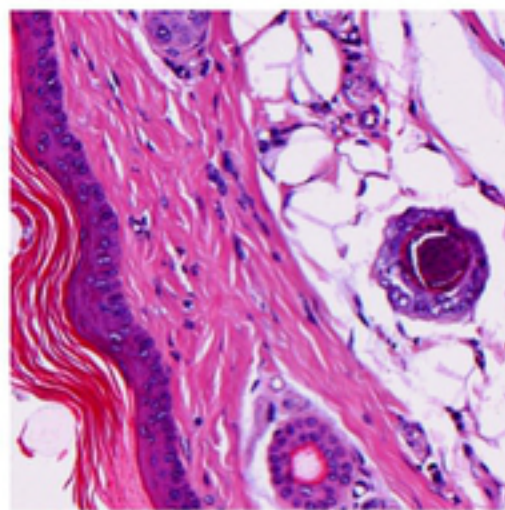**C.2**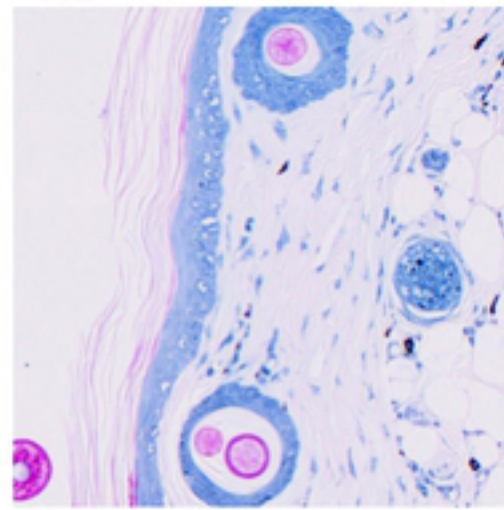**D.1**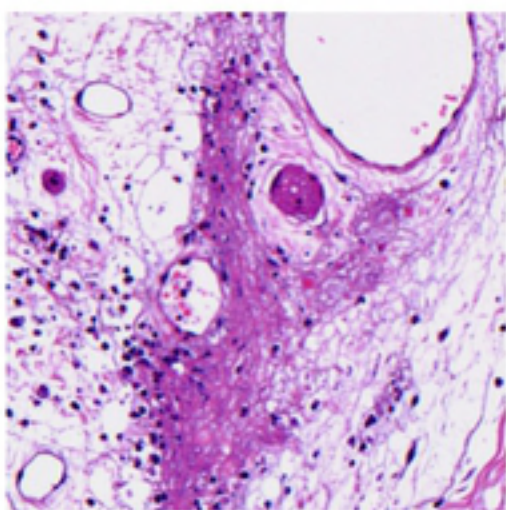**D.2**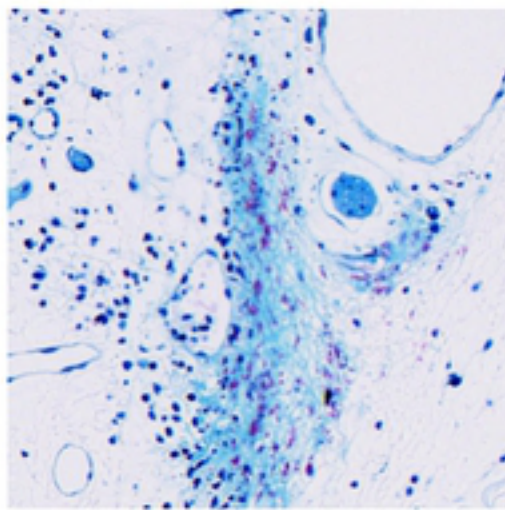**E.1**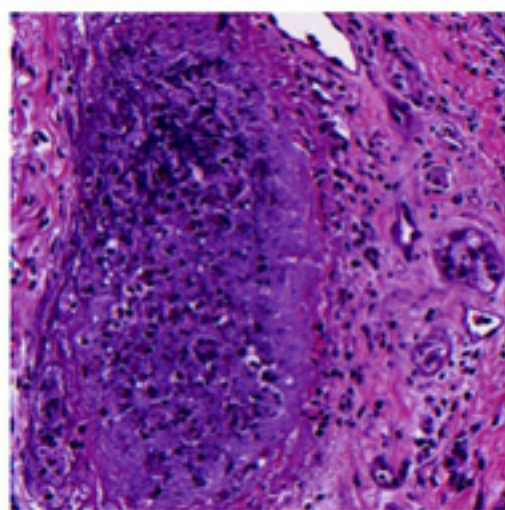**E.2**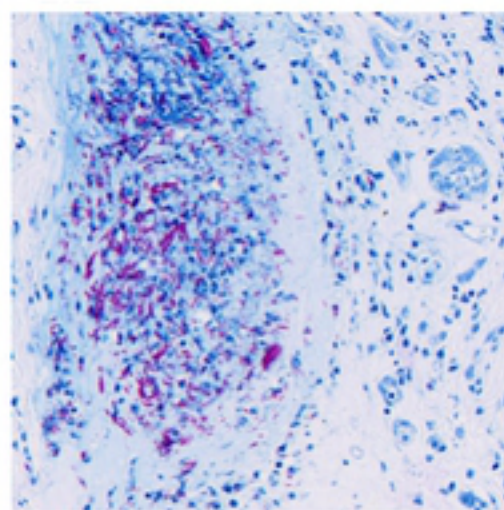

Source: https://www.biorxiv.org/content/10.1101/434506v1.full.pdf
